# Supplementary material
Source: HighWire-hosted journal article supplement (https://www.annals.org/content/suppl/2006/08/31/145.5.372)
Supplement: Huang_AT1_145-5-372-DC1-1.pdf [file Huang_AT1_145-5-372-DC1-1.pdf]

Appendix Table 1. Efficacy of Multivitamin and Mineral Supplement Use in Primary Prevention of Cancer\*

| Study (Reference)                     | Disease End Point                  | Study Supplement†                    | Participants, n‡ |                                      |                                         | Disease Events, n‡ |                                      |                                         | Unadjusted Relative Risk (95% CI) | Unadjusted Odds Ratio (95% CI) | Comments |
|---------------------------------------|------------------------------------|--------------------------------------|------------------|--------------------------------------|-----------------------------------------|--------------------|--------------------------------------|-----------------------------------------|-----------------------------------|--------------------------------|----------|
|                                       |                                    |                                      | Total            | Supplements with Specified Nutrients | Supplements without Specified Nutrients | Total              | Supplements with Specified Nutrients | Supplements without Specified Nutrients |                                   |                                |          |
| Linxian General Population Trial (18) | Total cancer incidence             | Retinol + zinc                       | 29 584           | –                                    | –                                       | 1298               | –                                    | –                                       | 1.00 (0.89–1.11)                  | –                              |          |
|                                       |                                    | Riboflavin + niacin                  |                  |                                      |                                         |                    |                                      |                                         | 0.95 (0.85–1.06)                  | –                              |          |
|                                       |                                    | Vitamin C + molybdenum               |                  |                                      |                                         |                    |                                      |                                         | 1.06 (0.95–1.18)                  | –                              |          |
|                                       |                                    | β-Carotene + selenium + α-tocopherol |                  |                                      |                                         |                    |                                      |                                         | 0.93 (0.83–1.03)                  | –                              |          |
|                                       | Gastric cancer incidence           | Retinol + zinc                       | 29 584           | –                                    | –                                       | 539                | –                                    | –                                       | 0.96 (0.81–1.14)                  | –                              |          |
|                                       |                                    | Riboflavin + niacin                  |                  |                                      |                                         |                    |                                      |                                         | 1.04 (0.88–1.23)                  | –                              |          |
|                                       |                                    | Vitamin C + molybdenum               |                  |                                      |                                         |                    |                                      |                                         | 1.10 (0.92–1.30)                  | –                              |          |
|                                       |                                    | β-Carotene + selenium + α-tocopherol |                  |                                      |                                         |                    |                                      |                                         | 0.84 (0.71–1.00)                  | –                              |          |
|                                       | Esophageal cancer incidence        | Retinol + zinc                       | 29 584           | –                                    | –                                       | 640                | –                                    | –                                       | 1.07 (0.92–1.25)                  | –                              |          |
|                                       |                                    | Riboflavin + niacin                  |                  |                                      |                                         |                    |                                      |                                         | 0.86 (0.74–1.01)                  | –                              |          |
|                                       |                                    | Vitamin C + molybdenum               |                  |                                      |                                         |                    |                                      |                                         | 1.06 (0.91–1.24)                  | –                              |          |
|                                       |                                    | β-Carotene + selenium + α-tocopherol |                  |                                      |                                         |                    |                                      |                                         | 1.02 (0.87–1.19)                  | –                              |          |
|                                       | Esophageal/cardia cancer incidence | Retinol + zinc                       | 29 584           | –                                    | –                                       | 1075               | –                                    | –                                       | 1.05 (0.93–1.19)                  | –                              |          |
|                                       |                                    | Riboflavin + niacin                  |                  |                                      |                                         |                    |                                      |                                         | 0.94 (0.83–1.06)                  | –                              |          |
|                                       |                                    | Vitamin C + molybdenum               |                  |                                      |                                         |                    |                                      |                                         | 1.06 (0.94–1.20)                  | –                              |          |
|                                       |                                    | β-Carotene + selenium + α-tocopherol |                  |                                      |                                         |                    |                                      |                                         | 0.94 (0.84–1.06)                  | –                              |          |
|                                       | Total cancer death                 | Retinol + zinc                       | 29 584           | –                                    | –                                       | 792                | –                                    | –                                       | 0.97 (0.85–1.12)                  | –                              |          |
|                                       |                                    | Riboflavin + niacin                  |                  |                                      |                                         |                    |                                      |                                         | 0.98 (0.85–1.13)                  | –                              |          |
|                                       |                                    | Vitamin C + molybdenum               |                  |                                      |                                         |                    |                                      |                                         | 1.06 (0.92–1.21)                  | –                              |          |
|                                       |                                    | β-Carotene + selenium + α-tocopherol |                  |                                      |                                         |                    |                                      |                                         | 0.87 (0.75–1.00)                  | –                              |          |
|                                       | Stomach cancer death               | Retinol + zinc                       | 29 584           | –                                    | –                                       | 331                | –                                    | –                                       | 1.03 (0.83–1.28)                  | –                              |          |
|                                       |                                    | Riboflavin + niacin                  |                  |                                      |                                         |                    |                                      |                                         | 1.00 (0.81–1.24)                  | –                              |          |
|                                       |                                    | Vitamin C + molybdenum               |                  |                                      |                                         |                    |                                      |                                         | 1.09 (0.88–1.36)                  | –                              |          |

Appendix Table 1—Continued

| Study (Reference)                                                    | Disease End Point                           | Study Supplement†                                   | Participants, n‡ |                                      |                                         | Disease Events, n‡ |                                      |                                         | Unadjusted Relative Risk (95% CI) | Unadjusted Odds Ratio (95% CI) | Comments                                        |
|----------------------------------------------------------------------|---------------------------------------------|-----------------------------------------------------|------------------|--------------------------------------|-----------------------------------------|--------------------|--------------------------------------|-----------------------------------------|-----------------------------------|--------------------------------|-------------------------------------------------|
|                                                                      |                                             |                                                     | Total            | Supplements with Specified Nutrients | Supplements without Specified Nutrients | Total              | Supplements with Specified Nutrients | Supplements without Specified Nutrients |                                   |                                |                                                 |
|                                                                      |                                             | $\beta$ -Carotene + selenium + $\alpha$ -tocopherol |                  |                                      |                                         |                    |                                      |                                         | 0.79 (0.64–0.99)                  | –                              |                                                 |
|                                                                      | Esophageal cancer death                     | Retinol + zinc                                      | 29 584           | –                                    | –                                       | 360                | –                                    | –                                       | 0.93 (0.76–1.15)                  | –                              |                                                 |
|                                                                      |                                             | Riboflavin + niacin                                 |                  |                                      |                                         |                    |                                      |                                         | 0.90 (0.73–1.11)                  | –                              |                                                 |
|                                                                      |                                             | Vitamin C + molybdenum                              |                  |                                      |                                         |                    |                                      |                                         | 1.05 (0.85–1.29)                  | –                              |                                                 |
|                                                                      |                                             | $\beta$ -Carotene + selenium + $\alpha$ -tocopherol |                  |                                      |                                         |                    |                                      |                                         | 0.96 (0.78–1.18)                  | –                              |                                                 |
|                                                                      | Esophageal/gastric cardia cancer death      | Retinol + zinc                                      | 29 584           | –                                    | –                                       | 613                | –                                    | –                                       | 1.04 (0.89–1.22)                  | –                              |                                                 |
|                                                                      |                                             | Riboflavin + niacin                                 |                  |                                      |                                         |                    |                                      |                                         | 0.95 (0.81–1.11)                  | –                              |                                                 |
|                                                                      |                                             | Vitamin C + molybdenum                              |                  |                                      |                                         |                    |                                      |                                         | 1.06 (0.90–1.24)                  | –                              |                                                 |
|                                                                      |                                             | $\beta$ -Carotene + selenium + $\alpha$ -tocopherol |                  |                                      |                                         |                    |                                      |                                         | 0.90 (0.77–1.05)                  | –                              |                                                 |
| Linxian General Population Trial: end-of-trial endoscopy survey (20) | Esophageal and gastric cancer and dysplasia | Retinol + zinc                                      | 391              | 197                                  | 194                                     | 60                 | 28                                   | 32                                      | –                                 | 0.83 (0.47–1.46)               | Adjusted for age, sex, smoking, and alcohol use |
|                                                                      |                                             | Riboflavin + niacin                                 |                  | 194                                  | 197                                     |                    | 34                                   | 26                                      | –                                 | 1.39 (0.79–2.44)               | Adjusted for age, sex, smoking, and alcohol use |
|                                                                      |                                             | Vitamin C + molybdenum                              |                  | 206                                  | 185                                     |                    | 37                                   | 23                                      | –                                 | 1.61 (0.91–2.86)               | Adjusted for age, sex, smoking, and alcohol use |
|                                                                      |                                             | $\beta$ -Carotene + selenium + $\alpha$ -tocopherol |                  | 177                                  | 214                                     |                    | 25                                   | 35                                      | –                                 | 0.83 (0.47–1.46)               | Adjusted for age, sex, smoking, and alcohol use |
|                                                                      | Esophageal and gastric cancer               | Retinol + zinc                                      | 391              | 197                                  | 194                                     | 31                 | 13                                   | 18                                      | –                                 | 0.61 (0.29–1.31)               |                                                 |
|                                                                      |                                             | Riboflavin + niacin                                 |                  | 194                                  | 197                                     |                    | 18                                   | 13                                      | –                                 | 1.46 (0.68–3.11)               |                                                 |
|                                                                      |                                             | Vitamin C + molybdenum                              |                  | 206                                  | 185                                     |                    | 21                                   | 10                                      | –                                 | 1.99 (0.90–4.41)               |                                                 |
|                                                                      |                                             | $\beta$ -Carotene + selenium + $\alpha$ -tocopherol |                  | 177                                  | 214                                     |                    | 12                                   | 19                                      | –                                 | 0.79 (0.36–1.69)               |                                                 |

Continued on following page

Appendix Table 1—Continued

| Study (Reference) | Disease End Point         | Study Supplement†                                           | Participants, n‡ |                                      |                                         | Disease Events, n‡ |                                      |                                         | Unadjusted Relative Risk (95% CI) | Unadjusted Odds Ratio (95% CI) | Comments                                                             |
|-------------------|---------------------------|-------------------------------------------------------------|------------------|--------------------------------------|-----------------------------------------|--------------------|--------------------------------------|-----------------------------------------|-----------------------------------|--------------------------------|----------------------------------------------------------------------|
|                   |                           |                                                             | Total            | Supplements with Specified Nutrients | Supplements without Specified Nutrients | Total              | Supplements with Specified Nutrients | Supplements without Specified Nutrients |                                   |                                |                                                                      |
| SU.VI.MAX (23)    | Cancer incidence          | Vitamin C + vitamin E + $\beta$ -carotene + selenium + zinc | 12 741           | 6364                                 | 6377                                    | 562                | 267                                  | 295                                     | 0.90 (0.76–1.06)                  |                                | <i>P</i> = 0.02 for the interaction between sex and randomized group |
|                   | Women only                |                                                             | 7713             | 3844                                 | 3869                                    | 350                | 179                                  | 171                                     | 1.04 (0.85–1.29)                  | –                              |                                                                      |
|                   | Men only                  |                                                             | 5028             | 2520                                 | 2508                                    | 212                | 88                                   | 124                                     | 0.69 (0.53–0.91)§                 | –                              |                                                                      |
| SU.VI.MAX (24)    | Prostate cancer incidence | Vitamin C + vitamin E + $\beta$ -carotene + selenium + zinc | 5034             | 2522                                 | 2512                                    | 103                | 49                                   | 54                                      | 0.88 (0.60–1.29)                  | –                              | Men only                                                             |
|                   |                           |                                                             | 4563             | 2293                                 | 2270                                    | 51                 | 18                                   | 33                                      | 0.52 (0.29–0.92)§                 | –                              | In men with initial PSA level < 3.0 $\mu$ g/L                        |
|                   |                           |                                                             | 292              | 149                                  | 143                                     | 50                 | 31                                   | 19                                      | 1.54 (0.87–2.72)                  | –                              | In men with initial PSA level $\geq$ 3.0 $\mu$ g/L                   |
|                   |                           |                                                             |                  |                                      |                                         |                    |                                      |                                         |                                   |                                |                                                                      |

\* – = not reported; PSA = prostate-specific antigen; SU.VI.MAX = SUplémentation en Vitamines et Minéraux AntioXydants.

† Unless otherwise specified, comparisons were made between groups receiving the combination of the listed nutrients and the groups receiving combinations of placebo or nutrients other than the nutrients listed.

‡ The total number is presented (when available) if the number in each comparison group was not reported.

§ *P* < 0.01.
