# Supplementary material
Source: HighWire-hosted journal article supplement (https://www.annals.org/content/suppl/2006/08/31/145.5.372)
Supplement: Huang_AT2_145-5-372-DC1-2.pdf [file Huang_AT2_145-5-372-DC1-2.pdf]

Appendix Table 2. Efficacy of Multivitamin and Mineral Supplement Use in Primary Prevention of Cardiovascular Disease and Hypertension\*

| Study (Reference)                     | Disease End Point | Study Supplement                                                                                                 | Participants, <i>n</i> |                                               |                                                  | Disease Events, <i>n</i>                      |                                                  | Incidence of Disease End Point, <i>n per 1000 persons</i> |                                                  | Prevalence of Disease End Point, %            |                                                  | Unadjusted Relative Risk (95% CI) | Unadjusted Odds Ratio (95% CI) |
|---------------------------------------|-------------------|------------------------------------------------------------------------------------------------------------------|------------------------|-----------------------------------------------|--------------------------------------------------|-----------------------------------------------|--------------------------------------------------|-----------------------------------------------------------|--------------------------------------------------|-----------------------------------------------|--------------------------------------------------|-----------------------------------|--------------------------------|
|                                       |                   |                                                                                                                  | Total                  | Received Supplements with Specified Nutrients | Received Supplements without Specified Nutrients | Received Supplements with Specified Nutrients | Received Supplements without Specified Nutrients | Received Supplements with Specified Nutrients             | Received Supplements without Specified Nutrients | Received Supplements with Specified Nutrients | Received Supplements without Specified Nutrients |                                   |                                |
| Linxian General Population Trial (21) | Death from stroke | Retinol + zinc + riboflavin + niacin vs. placebo                                                                 | 29 584†                | –                                             | –                                                | 66                                            | 77                                               | 3.5                                                       | 4.1                                              | –                                             | –                                                | 0.85 (0.61–1.18)                  | –                              |
|                                       |                   | Retinol + zinc + vitamin C + molybdenum vs. placebo                                                              |                        |                                               |                                                  | 71                                            | 77                                               | 3.8                                                       | 4.1                                              | –                                             | –                                                | 0.91 (0.66–1.27)                  | –                              |
|                                       |                   | Retinol + zinc + β-carotene + selenium + α-tocopherol vs. placebo                                                |                        |                                               |                                                  | 55                                            | 77                                               | 2.9                                                       | 4.1                                              | –                                             | –                                                | 0.71 (0.50–1.00)                  | –                              |
|                                       |                   | Riboflavin + niacin + vitamin C + molybdenum vs. placebo                                                         |                        |                                               |                                                  | 60                                            | 77                                               | 3.2                                                       | 4.1                                              | –                                             | –                                                | 0.78 (0.55–1.09)                  | –                              |
|                                       |                   | Riboflavin + niacin + β-carotene + selenium + α-tocopherol vs. placebo                                           |                        |                                               |                                                  | 58                                            | 77                                               | 3.1                                                       | 4.1                                              | –                                             | –                                                | 0.75 (0.53–1.05)                  | –                              |
|                                       |                   | Vitamin C + molybdenum + β-carotene + selenium + α-tocopherol vs. placebo                                        |                        |                                               |                                                  | 67                                            | 77                                               | 3.6                                                       | 4.1                                              | –                                             | –                                                | 0.86 (0.62–1.20)                  | –                              |
|                                       |                   | Retinol + zinc + riboflavin + niacin + vitamin C + molybdenum + β-carotene + selenium + α-tocopherol vs. placebo |                        |                                               |                                                  | 69                                            | 77                                               | 3.7                                                       | 4.1                                              | –                                             | –                                                | 0.88 (0.64–1.22)                  | –                              |
|                                       |                   | Retinol + zinc                                                                                                   |                        |                                               |                                                  | –                                             | –                                                | –                                                         | –                                                | –                                             | –                                                | 0.99 (0.84–1.18)                  | –                              |
|                                       |                   | Riboflavin + niacin                                                                                              |                        |                                               |                                                  |                                               |                                                  |                                                           |                                                  |                                               |                                                  | 0.94 (0.79–1.11)                  | –                              |

Continued on following page

Appendix Table 2—Continued

| Study (Reference) | Disease End Point | Study Supplement                                                  | Participants, <i>n</i> |                                               | Disease Events, <i>n</i>                         |                                               | Incidence of Disease End Point, <i>n per 1000 persons</i> |                                               | Prevalence of Disease End Point, %               |                                               | Unadjusted Relative Risk (95% CI)             | Unadjusted Odds Ratio (95% CI) |
|-------------------|-------------------|-------------------------------------------------------------------|------------------------|-----------------------------------------------|--------------------------------------------------|-----------------------------------------------|-----------------------------------------------------------|-----------------------------------------------|--------------------------------------------------|-----------------------------------------------|-----------------------------------------------|--------------------------------|
|                   |                   |                                                                   | Total                  | Received Supplements with Specified Nutrients | Received Supplements without Specified Nutrients | Received Supplements with Specified Nutrients | Received Supplements without Specified Nutrients          | Received Supplements with Specified Nutrients | Received Supplements without Specified Nutrients | Received Supplements with Specified Nutrients |                                               |                                |
|                   |                   | Vitamin C + molybdenum†                                           |                        |                                               |                                                  |                                               |                                                           |                                               |                                                  |                                               | 1.04 (0.88–1.24)                              | –                              |
|                   |                   | β-Carotene + selenium + α-tocopherol                              |                        |                                               |                                                  |                                               |                                                           |                                               |                                                  |                                               | 0.91 (0.76–1.07)                              | –                              |
|                   | Hypertension      | Retinol + zinc + riboflavin + niacin vs. placebo                  | 29 584†                | –                                             | –                                                | –                                             | –                                                         | –                                             | –                                                | –                                             | Isolated systolic: 1.08 (0.85–1.38)           | –                              |
|                   |                   |                                                                   |                        |                                               |                                                  |                                               |                                                           |                                               |                                                  |                                               | Isolated diastolic: 0.94 (0.70–1.26)          | –                              |
|                   |                   |                                                                   |                        |                                               |                                                  |                                               |                                                           |                                               |                                                  |                                               | Both systolic and diastolic: 1.08 (0.87–1.35) | –                              |
|                   |                   | Retinol + zinc + vitamin C + molybdenum vs. placebo               |                        |                                               |                                                  | –                                             | –                                                         | –                                             | –                                                | –                                             | Isolated systolic: 1.11 (0.88–1.41)           | –                              |
|                   |                   |                                                                   |                        |                                               |                                                  |                                               |                                                           |                                               |                                                  |                                               | Isolated diastolic: 0.94 (0.70–1.26)          | –                              |
|                   |                   |                                                                   |                        |                                               |                                                  |                                               |                                                           |                                               |                                                  |                                               | Both systolic and diastolic: 0.93 (0.74–1.16) | –                              |
|                   |                   | Retinol + zinc + β-carotene + selenium + α-tocopherol vs. placebo |                        |                                               |                                                  | –                                             | –                                                         | –                                             | –                                                | –                                             | Isolated systolic: 1.07 (0.85–1.36)           | –                              |
|                   |                   |                                                                   |                        |                                               |                                                  |                                               |                                                           |                                               |                                                  |                                               | Isolated diastolic: 1.23 (0.93–1.62)          | –                              |
|                   |                   |                                                                   |                        |                                               |                                                  |                                               |                                                           |                                               |                                                  |                                               | Both systolic and diastolic: 1.01 (0.81–1.26) | –                              |
|                   |                   | Riboflavin + niacin + vitamin C + molybdenum vs. placebo          |                        |                                               |                                                  | –                                             | –                                                         | –                                             | –                                                | –                                             | Isolated systolic: 0.96 (0.76–1.22)           | –                              |
|                   |                   |                                                                   |                        |                                               |                                                  |                                               |                                                           |                                               |                                                  |                                               | Isolated diastolic: 0.68 (0.50–0.94)          | –                              |
|                   |                   |                                                                   |                        |                                               |                                                  |                                               |                                                           |                                               |                                                  |                                               | Both systolic and diastolic: 0.92 (0.74–1.15) | –                              |

Appendix Table 2—Continued

| Study (Reference) | Disease End Point | Study Supplement                                                                                                                | Participants, <i>n</i> |                                               | Disease Events, <i>n</i>                         |                                               | Incidence of Disease End Point, <i>n per 1000 persons</i> |                                               | Prevalence of Disease End Point, %               |                                               | Unadjusted Relative Risk (95% CI)             | Unadjusted Odds Ratio (95% CI) |
|-------------------|-------------------|---------------------------------------------------------------------------------------------------------------------------------|------------------------|-----------------------------------------------|--------------------------------------------------|-----------------------------------------------|-----------------------------------------------------------|-----------------------------------------------|--------------------------------------------------|-----------------------------------------------|-----------------------------------------------|--------------------------------|
|                   |                   |                                                                                                                                 | Total                  | Received Supplements with Specified Nutrients | Received Supplements without Specified Nutrients | Received Supplements with Specified Nutrients | Received Supplements without Specified Nutrients          | Received Supplements with Specified Nutrients | Received Supplements without Specified Nutrients | Received Supplements with Specified Nutrients |                                               |                                |
|                   |                   | Riboflavin + niacin + $\beta$ -carotene + selenium + $\alpha$ -tocopherol vs. placebo                                           |                        |                                               |                                                  | –                                             | –                                                         | –                                             | –                                                | –                                             | Isolated systolic: 0.98 (0.77–1.25)           | –                              |
|                   |                   |                                                                                                                                 |                        |                                               |                                                  |                                               |                                                           |                                               |                                                  |                                               | Isolated diastolic: 0.90 (0.67–1.22)          | –                              |
|                   |                   |                                                                                                                                 |                        |                                               |                                                  |                                               |                                                           |                                               |                                                  |                                               | Both systolic and diastolic: 1.03 (0.82–1.28) | –                              |
|                   |                   | Vitamin C + molybdenum + $\beta$ -carotene + selenium + $\alpha$ -tocopherol vs. placebo                                        |                        |                                               |                                                  | –                                             | –                                                         | –                                             | –                                                | –                                             | Isolated systolic: 0.93 (0.73–1.19)           | –                              |
|                   |                   |                                                                                                                                 |                        |                                               |                                                  |                                               |                                                           |                                               |                                                  |                                               | Isolated diastolic: 1.13 (0.86–1.50)          | –                              |
|                   |                   |                                                                                                                                 |                        |                                               |                                                  |                                               |                                                           |                                               |                                                  |                                               | Both systolic and diastolic: 0.85 (0.67–1.06) | –                              |
|                   |                   | Retinol + zinc + riboflavin + niacin + vitamin C + molybdenum + $\beta$ -carotene + selenium + $\alpha$ -tocopherol vs. placebo |                        |                                               |                                                  | –                                             | –                                                         | –                                             | –                                                | –                                             | Isolated systolic: 0.91 (0.71–1.16)           | –                              |
|                   |                   |                                                                                                                                 |                        |                                               |                                                  |                                               |                                                           |                                               |                                                  |                                               | Isolated diastolic: 1.10 (0.84–1.47)          | –                              |
|                   |                   |                                                                                                                                 |                        |                                               |                                                  |                                               |                                                           |                                               |                                                  |                                               | Both systolic and diastolic: 0.97 (0.77–1.20) | –                              |
|                   |                   | Retinol + zinc                                                                                                                  |                        |                                               |                                                  | –                                             | –                                                         | –                                             | –                                                | –                                             | Isolated systolic: 1.07 (0.96–1.21)           | –                              |
|                   |                   |                                                                                                                                 |                        |                                               |                                                  |                                               |                                                           |                                               |                                                  |                                               | Isolated diastolic: 1.13 (0.98–1.31)          | –                              |
|                   |                   |                                                                                                                                 |                        |                                               |                                                  |                                               |                                                           |                                               |                                                  |                                               | Both systolic and diastolic: 1.05 (0.94–1.18) | –                              |

Continued on following page

Appendix Table 2—Continued

| Study (Reference) | Disease End Point                         | Study Supplement                                                 | Participants, <i>n</i> |                                               |                                                  | Disease Events, <i>n</i>                      |                                                  | Incidence of Disease End Point, <i>n per 1000 persons</i> |                                                  | Prevalence of Disease End Point, %            |                                                  | Unadjusted Relative Risk (95% CI)             | Unadjusted Odds Ratio (95% CI) |
|-------------------|-------------------------------------------|------------------------------------------------------------------|------------------------|-----------------------------------------------|--------------------------------------------------|-----------------------------------------------|--------------------------------------------------|-----------------------------------------------------------|--------------------------------------------------|-----------------------------------------------|--------------------------------------------------|-----------------------------------------------|--------------------------------|
|                   |                                           |                                                                  | Total                  | Received Supplements with Specified Nutrients | Received Supplements without Specified Nutrients | Received Supplements with Specified Nutrients | Received Supplements without Specified Nutrients | Received Supplements with Specified Nutrients             | Received Supplements without Specified Nutrients | Received Supplements with Specified Nutrients | Received Supplements without Specified Nutrients |                                               |                                |
|                   |                                           | Riboflavin + niacin                                              |                        |                                               |                                                  | –                                             | –                                                | –                                                         | –                                                | –                                             | –                                                | Isolated systolic: 0.95 (0.85–1.08)           | –                              |
|                   |                                           |                                                                  |                        |                                               |                                                  |                                               |                                                  |                                                           |                                                  |                                               |                                                  | Isolated diastolic: 0.84 (0.73–0.98)          | –                              |
|                   |                                           |                                                                  |                        |                                               |                                                  |                                               |                                                  |                                                           |                                                  |                                               |                                                  | Both systolic and diastolic: 1.05 (0.94–1.18) | –                              |
|                   |                                           | Vitamin C + molybdenum                                           |                        |                                               |                                                  | –                                             | –                                                | –                                                         | –                                                | –                                             | –                                                | Isolated systolic: 0.94 (0.84–1.07)           | –                              |
|                   |                                           |                                                                  |                        |                                               |                                                  |                                               |                                                  |                                                           |                                                  |                                               |                                                  | Isolated diastolic: 0.95 (0.82–1.10)          | –                              |
|                   |                                           |                                                                  |                        |                                               |                                                  |                                               |                                                  |                                                           |                                                  |                                               |                                                  | Both systolic and diastolic: 0.89 (0.79–0.99) | –                              |
|                   |                                           | β-Carotene + selenium + α-tocopherol                             |                        |                                               |                                                  | –                                             | –                                                | –                                                         | –                                                | –                                             | –                                                | Isolated systolic: 0.93 (0.83–1.05)           | –                              |
|                   |                                           |                                                                  |                        |                                               |                                                  |                                               |                                                  |                                                           |                                                  |                                               |                                                  | Isolated diastolic: 1.23 (1.06–1.42)          | –                              |
|                   |                                           |                                                                  |                        |                                               |                                                  |                                               |                                                  |                                                           |                                                  |                                               |                                                  | Both systolic and diastolic: 0.98 (0.87–1.09) | –                              |
| SU.VI.MAX (23)    | Ischemic cardiovascular disease incidence | Vitamin C + vitamin E + β-carotene + selenium + zinc vs. placebo | 6364                   | 6377                                          | 134                                              | 137                                           | –                                                | –                                                         | –                                                | –                                             | –                                                | 0.97 (0.77–1.20)                              | –                              |
| SU.VI.MAX (25)    | Hypertension‡                             | Vitamin C + vitamin E + β-carotene + selenium + zinc vs. placebo | Women                  | 1502                                          | 1431                                             | –                                             | –                                                | –                                                         | –                                                | Year 1: 19.4                                  | Year 1: 20.8                                     | –                                             | 1.10 (0.95–1.29)               |
|                   |                                           |                                                                  | Men                    | 1117                                          | 1431                                             | –                                             | –                                                | –                                                         | –                                                | Year 6: 34.6                                  | Year 6: 32.4                                     | –                                             | 1.04 (0.87–1.23)               |
|                   |                                           |                                                                  |                        |                                               |                                                  |                                               |                                                  |                                                           |                                                  | Year 1: 44.7                                  | Year 1: 42.0                                     | –                                             |                                |
|                   |                                           |                                                                  |                        |                                               |                                                  |                                               |                                                  |                                                           |                                                  | Year 6: 54.6                                  | Year 6: 53.8                                     | –                                             |                                |

\* Comparisons were made between the groups receiving the combination of the listed nutrients and groups receiving combinations of placebo or nutrients other than the nutrients listed. – = not reported; SU.VI.MAX = SUplémentation en Vitamines et Minéraux AntioXydants.

† The number of participants in each randomized group was not reported.

‡ Defined as systolic blood pressure ≥ 140 mm Hg, diastolic blood pressure ≥ 90 mm Hg, or antihypertensive drug use at the end of the study.
