# Supplementary material
Source: HighWire-hosted journal article supplement (https://www.annals.org/content/suppl/2006/08/31/145.5.372)
Supplement: Huang_AT3_145-5-372-DC1-3.pdf [file Huang_AT3_145-5-372-DC1-3.pdf]

Appendix Table 3. Efficacy of Multivitamin and Mineral Supplement Use in Primary Prevention of Cataracts and Age-Related Macular Degeneration\*

| Study (Reference)                                | Disease End Point                                   | Study Supplement                                    | Participants, n† |                                               |                                                  | Disease Events, n‡ |                                               |                                                  | Prevalence of Disease End Point               |                                                  | Unadjusted Odds Ratio (95% or 99% CI)§                                                                      | Change in Outcome Measure |               | Comment |
|--------------------------------------------------|-----------------------------------------------------|-----------------------------------------------------|------------------|-----------------------------------------------|--------------------------------------------------|--------------------|-----------------------------------------------|--------------------------------------------------|-----------------------------------------------|--------------------------------------------------|-------------------------------------------------------------------------------------------------------------|---------------------------|---------------|---------|
|                                                  |                                                     |                                                     | Total            | Received Supplements with Specified Nutrients | Received Supplements without Specified Nutrients | All Participants   | Received Supplements with Specified Nutrients | Received Supplements without Specified Nutrients | Received Supplements with Specified Nutrients | Received Supplements without Specified Nutrients |                                                                                                             | Treatment Group           | Placebo Group |         |
| Linxian General Population Trial: cataracts (22) | Prevalence of nuclear cataracts                     | Retinol + zinc                                      | 3249             | 1628                                          | 1621                                             | –                  | –                                             | –                                                | 0.120                                         | 0.151                                            | 0.77 (0.58–1.02)                                                                                            | –                         | –             |         |
|                                                  |                                                     | Riboflavin + niacin                                 |                  | 1623                                          | 1626                                             | –                  | –                                             | –                                                | 0.107                                         | 0.169                                            | Overall, 0.59 (0.45–0.79); 0.99 (0.62–1.59) in persons age 55–64 y; 0.45 (0.31–0.64) in persons age 65–74 y | –                         | –             |         |
|                                                  |                                                     | Vitamin C + molybdenum                              |                  | 1654                                          | 1595                                             | –                  | –                                             | –                                                | 0.121                                         | 0.150                                            |                                                                                                             | 0.78 (0.59–1.04)          | –             | –       |
|                                                  | $\beta$ -Carotene + selenium + $\alpha$ -tocopherol |                                                     | 1617             | 1632                                          | –                                                | –                  | –                                             | 0.146                                            | 0.125                                         | 1.19 (0.90–1.59)                                 | –                                                                                                           | –                         |               |         |
|                                                  | Prevalence of cortical cataracts                    | Retinol + zinc                                      |                  | 1628                                          | 1621                                             | –                  | –                                             | –                                                | 0.342                                         | 0.325                                            | 1.08 (0.92–1.27)                                                                                            | –                         | –             |         |
|                                                  |                                                     | Riboflavin + niacin                                 |                  | 1623                                          | 1626                                             | –                  | –                                             | –                                                | 0.342                                         | 0.325                                            | 1.08 (0.92–1.27)                                                                                            | –                         | –             |         |
|                                                  |                                                     | Vitamin C + molybdenum                              |                  | 1654                                          | 1595                                             | –                  | –                                             | –                                                | 0.325                                         | 0.342                                            | 0.92 (0.79–1.09)                                                                                            | –                         | –             |         |
|                                                  | $\beta$ -Carotene + selenium + $\alpha$ -tocopherol |                                                     | 1617             | 1632                                          | –                                                | –                  | –                                             | 0.330                                            | 0.338                                         | 0.96 (0.82–1.13)                                 | –                                                                                                           | –                         |               |         |
|                                                  | Prevalence of posterior subcapsular cataracts       | Retinol + zinc                                      |                  | 1628                                          | 1621                                             | –                  | –                                             | –                                                | 0.008                                         | 0.013                                            | 0.59 (0.31–1.14)                                                                                            | –                         | –             |         |
|                                                  |                                                     | Riboflavin + niacin                                 |                  | 1623                                          | 1626                                             | –                  | –                                             | –                                                | 0.016                                         | 0.006                                            | 2.64 (1.31–5.35)                                                                                            | –                         | –             |         |
|                                                  |                                                     | Vitamin C + molybdenum                              |                  | 1654                                          | 1595                                             | –                  | –                                             | –                                                | 0.011                                         | 0.009                                            | 1.25 (0.65–2.38)                                                                                            | –                         | –             |         |
|                                                  |                                                     | $\beta$ -Carotene + selenium + $\alpha$ -tocopherol |                  | 1617                                          | 1632                                             | –                  | –                                             | –                                                | 0.013                                         | 0.008                                            | 1.56 (0.81–3.00)                                                                                            | –                         | –             |         |

Continued on following page

Appendix Table 3—Continued

| Study (Reference)    | Disease End Point                                    | Study Supplement                                                                                                                               | Participants, n‡ |                                               |                                                  | Disease Events, n‡ |                                               |                                                  | Prevalence of Disease End Point               |                                                  | Unadjusted Odds Ratio (95% or 99% CI)§ | Change in Outcome Measure                                                    |                                                                            | Comment                                                                                                                                                                                                                                                                                   |
|----------------------|------------------------------------------------------|------------------------------------------------------------------------------------------------------------------------------------------------|------------------|-----------------------------------------------|--------------------------------------------------|--------------------|-----------------------------------------------|--------------------------------------------------|-----------------------------------------------|--------------------------------------------------|----------------------------------------|------------------------------------------------------------------------------|----------------------------------------------------------------------------|-------------------------------------------------------------------------------------------------------------------------------------------------------------------------------------------------------------------------------------------------------------------------------------------|
|                      |                                                      |                                                                                                                                                | Total            | Received Supplements with Specified Nutrients | Received Supplements without Specified Nutrients | All Participants   | Received Supplements with Specified Nutrients | Received Supplements without Specified Nutrients | Received Supplements with Specified Nutrients | Received Supplements without Specified Nutrients |                                        | Treatment Group                                                              | Placebo Group                                                              |                                                                                                                                                                                                                                                                                           |
| MONMD (26)           | Acuity of left eyes, distance visual acuity [logMAR] | β-Carotene + vitamin E + vitamin C + zinc picolinate + selenium + vitamin B <sub>2</sub> + chromium + nonvitamin/mineral nutrients vs. placebo | 71               | 39                                            | 32                                               | –                  | –                                             | –                                                | –                                             | –                                                | –                                      | From 0.17 to 0.19 logMAR                                                     | From 0.26 to 0.35 logMAR                                                   | No difference between randomized groups in refraction, metamorphosis, and Lens Opacities Classification System II readings on nuclear color, nuclear opalescence, and posterior subcapsular opacities; unexpected cortical cataractogenic effect for right eyes in the multivitamin group |
|                      | Acuity of left eyes, near visual acuity [M print]    |                                                                                                                                                | 71               | 39                                            | 32                                               | –                  | –                                             | –                                                | –                                             | –                                                | –                                      | From 0.77 M to 0.89 M¶                                                       | From 1.29 M to 2.03 M                                                      |                                                                                                                                                                                                                                                                                           |
| REACT (27)           | Anterior percentage pixel opaque (primary end point) | β-Carotene + vitamin C + <i>all-rac</i> α-tocopherol vs. placebo                                                                               | 158              | 81                                            | 77                                               | –                  | –                                             | –                                                | –                                             | –                                                | –                                      | Baseline, 5.7 ± 1.6, last, 7.3 ± 2.0; mean change from baseline, 1.7 ± 1.0** | Baseline, 5.0 ± 1.4; last, 8.3 ± 2.2; mean change from baseline, 3.3 ± 1.4 | Unfavorable changes in secondary outcomes were smaller in the active supplement group, but none was significantly different from placebo group.                                                                                                                                           |
| AREDS: cataract (28) | Total lens events                                    | Vitamin C + vitamin E + β-carotene                                                                                                             | 4596             | 2286                                          | 2310                                             | 1541               | 756                                           | 785                                              | –                                             | –                                                | 0.97 (0.84–1.11)                       | –                                                                            | –                                                                          | Adjustments for several potential confounders did not materially alter results                                                                                                                                                                                                            |
|                      | Cataract surgery                                     |                                                                                                                                                | 4596             | 2286                                          | 2310                                             | 675                | –                                             | –                                                | –                                             | –                                                | 0.94 (0.77–1.14)                       | –                                                                            | –                                                                          |                                                                                                                                                                                                                                                                                           |
|                      | Severe lens event                                    |                                                                                                                                                | 4596             | 2286                                          | 2310                                             | 991                | –                                             | –                                                | –                                             | –                                                | 0.92 (0.76–1.12)                       | –                                                                            | –                                                                          |                                                                                                                                                                                                                                                                                           |
|                      | Nuclear event                                        |                                                                                                                                                | 4331             | –                                             | –                                                | 1674               | –                                             | –                                                | –                                             | –                                                | 0.98 (0.84–1.14)                       | –                                                                            | –                                                                          |                                                                                                                                                                                                                                                                                           |

Appendix Table 3—Continued

| Study (Reference) | Disease End Point                                                                                                                | Study Supplement                                                           | Participants, n† |                                               |                                                  | Disease Events, n‡ |                                               |                                                  | Prevalence of Disease End Point               |                                                  | Unadjusted Odds Ratio (95% or 99% CI)§ | Change in Outcome Measure |               | Comment                                                                |
|-------------------|----------------------------------------------------------------------------------------------------------------------------------|----------------------------------------------------------------------------|------------------|-----------------------------------------------|--------------------------------------------------|--------------------|-----------------------------------------------|--------------------------------------------------|-----------------------------------------------|--------------------------------------------------|----------------------------------------|---------------------------|---------------|------------------------------------------------------------------------|
|                   |                                                                                                                                  |                                                                            | Total            | Received Supplements with Specified Nutrients | Received Supplements without Specified Nutrients | All Participants   | Received Supplements with Specified Nutrients | Received Supplements without Specified Nutrients | Received Supplements with Specified Nutrients | Received Supplements without Specified Nutrients |                                        | Treatment Group           | Placebo Group |                                                                        |
|                   |                                                                                                                                  | Vitamin C + vitamin E + $\beta$ -carotene vs. placebo                      | 2715             | —                                             | —                                                | 1027               | —                                             | —                                                | —                                             | —                                                | 1.00 (0.82–1.22)                       | —                         | —             |                                                                        |
|                   | Cortical event                                                                                                                   | Vitamin C + vitamin E + $\beta$ -carotene                                  | 4329             | —                                             | —                                                | 1058               | —                                             | —                                                | —                                             | —                                                | 0.99 (0.82–1.19)                       | —                         | —             |                                                                        |
|                   |                                                                                                                                  | Vitamin C + vitamin E + $\beta$ -carotene vs. placebo                      | 2715             | —                                             | —                                                | 625                | —                                             | —                                                | —                                             | —                                                | 0.91 (0.71–1.15)                       | —                         | —             |                                                                        |
|                   | Posterior subcapsular event                                                                                                      | Vitamin C + vitamin E + $\beta$ -carotene                                  | 4329             | —                                             | —                                                | 888                | —                                             | —                                                | —                                             | —                                                | 0.94 (0.78–1.14)                       | —                         | —             |                                                                        |
|                   |                                                                                                                                  | Vitamin C + vitamin E + $\beta$ -carotene vs. placebo                      | 2715             | —                                             | —                                                | 535                | —                                             | —                                                | —                                             | —                                                | 0.91 (0.70–1.17)                       | —                         | —             |                                                                        |
|                   | Lens event in eyes without opacities                                                                                             | Vitamin C + vitamin E + $\beta$ -carotene (comparison group not specified) | 823              | —                                             | —                                                | —                  | —                                             | —                                                | —                                             | —                                                | 0.85 (0.55–1.33)                       | —                         | —             | Among those with no or minimal opacity in at least 1 eye at enrollment |
|                   | Loss of visual acuity score of 15 letters or more                                                                                | Vitamin C + vitamin E + $\beta$ -carotene vs. placebo                      | —                | 537                                           | 580                                              | 172                | —                                             | —                                                | —                                             | —                                                | 1.03 (0.63–1.66)                       | —                         | —             | Among those without age-related macular degeneration at enrollment     |
| AREDS:            | Progression to advanced age-related macular degeneration (among those in age-related macular degeneration categories 2, 3, or 4) | Vitamin C + vitamin E + $\beta$ -carotene                                  | 3609             | —                                             | —                                                | 803                | —                                             | —                                                | —                                             | —                                                | 0.87 (0.70–1.09)                       | —                         | —             |                                                                        |

Continued on following page

Appendix Table 3—Continued

| Study (Reference) | Disease End Point                                                                                                                 | Study Supplement                                      | Participants, n‡ |                                               |                                                  | Disease Events, n‡ |                                               |                                                  | Prevalence of Disease End Point               |                                                  | Unadjusted Odds Ratio (95% or 99% CI)§ | Change in Outcome Measure |               | Comment                                                                                                                                           |
|-------------------|-----------------------------------------------------------------------------------------------------------------------------------|-------------------------------------------------------|------------------|-----------------------------------------------|--------------------------------------------------|--------------------|-----------------------------------------------|--------------------------------------------------|-----------------------------------------------|--------------------------------------------------|----------------------------------------|---------------------------|---------------|---------------------------------------------------------------------------------------------------------------------------------------------------|
|                   |                                                                                                                                   |                                                       | Total            | Received Supplements with Specified Nutrients | Received Supplements without Specified Nutrients | All Participants   | Received Supplements with Specified Nutrients | Received Supplements without Specified Nutrients | Received Supplements with Specified Nutrients | Received Supplements without Specified Nutrients |                                        | Treatment Group           | Placebo Group |                                                                                                                                                   |
|                   |                                                                                                                                   | Vitamin C + vitamin E + β-carotene vs. placebo        |                  |                                               |                                                  |                    |                                               |                                                  |                                               |                                                  | 0.80 (0.59–1.09)                       | –                         | –             | Analysis adjusted for sex, age, race, and category, and smoking status at enrollment, did not materially alter the size or direction of estimates |
|                   |                                                                                                                                   | Vitamin C + vitamin E + β-carotene + zinc vs. placebo |                  |                                               |                                                  |                    |                                               |                                                  |                                               |                                                  | 0.72 (0.52–0.98)††                     | –                         | –             |                                                                                                                                                   |
|                   | Loss of visual acuity score of ≥ 15 letters from baseline (among those in age-related macular degeneration categories 2, 3, or 4) | Vitamin C + vitamin E + β-carotene                    | 3597             | –                                             | –                                                | 1197               | –                                             | –                                                | –                                             | –                                                | 0.90 (0.74–1.09)                       | –                         | –             |                                                                                                                                                   |
|                   |                                                                                                                                   | Vitamin C + vitamin E + β-carotene vs. placebo        |                  |                                               |                                                  |                    |                                               |                                                  |                                               |                                                  | 0.88 (0.67–1.15)                       | –                         | –             |                                                                                                                                                   |
|                   |                                                                                                                                   | Vitamin C + vitamin E + β-carotene + zinc vs. placebo |                  |                                               |                                                  |                    |                                               |                                                  |                                               |                                                  | 0.79 (0.60–1.04)††                     | –                         | –             |                                                                                                                                                   |
|                   | Progression to advanced age-related macular degeneration (among those in age-related macular degeneration categories 3 or 4)      | Vitamin C + vitamin E + β-carotene                    | 2556             | –                                             | –                                                | 775                | –                                             | –                                                | –                                             | –                                                | 0.83 (0.66–1.06)§§                     | –                         | –             |                                                                                                                                                   |

Appendix Table 3—Continued

| Study (Reference) | Disease End Point                                                                                                                  | Study Supplement†                                            | Participants, n‡ |                                               |                                                  | Disease Events, n‡ |                                               |                                                  | Prevalence of Disease End Point               |                                                  | Unadjusted Odds Ratio (95% or 99% CI)§ | Change in Outcome Measure |               | Comment |
|-------------------|------------------------------------------------------------------------------------------------------------------------------------|--------------------------------------------------------------|------------------|-----------------------------------------------|--------------------------------------------------|--------------------|-----------------------------------------------|--------------------------------------------------|-----------------------------------------------|--------------------------------------------------|----------------------------------------|---------------------------|---------------|---------|
|                   |                                                                                                                                    |                                                              | Total            | Received Supplements with Specified Nutrients | Received Supplements without Specified Nutrients | All Participants   | Received Supplements with Specified Nutrients | Received Supplements without Specified Nutrients | Received Supplements with Specified Nutrients | Received Supplements without Specified Nutrients |                                        | Treatment Group           | Placebo Group |         |
|                   |                                                                                                                                    | Vitamin C + vitamin E + $\beta$ -carotene vs. placebo        | 2549             | –                                             | –                                                | 1022               | –                                             | –                                                | –                                             | –                                                | 0.76 (0.55–1.05)‡‡                     | –                         | –             |         |
|                   |                                                                                                                                    | Vitamin C + vitamin E + $\beta$ -carotene + zinc vs. placebo |                  |                                               |                                                  |                    |                                               |                                                  |                                               |                                                  | 0.66 (0.47–0.91)‡‡‡                    | –                         | –             |         |
|                   | Loss of visual acuity score of $\geq 15$ letters from baseline (among those in age-related macular degeneration categories 3 or 4) | Vitamin C + vitamin E + $\beta$ -carotene                    |                  |                                               |                                                  |                    |                                               |                                                  |                                               |                                                  | 0.86 (0.70–1.07)                       | –                         | –             |         |
|                   |                                                                                                                                    | Vitamin C + vitamin E + $\beta$ -carotene vs. placebo        |                  |                                               |                                                  |                    |                                               |                                                  |                                               |                                                  | 0.85 (0.63–1.14)                       | –                         | –             |         |
|                   |                                                                                                                                    | Vitamin C + vitamin E + $\beta$ -carotene + zinc vs. placebo |                  |                                               |                                                  |                    |                                               |                                                  |                                               |                                                  | 0.73 (0.54–0.99)¶¶                     | –                         | –             |         |

\* – = not reported; AREDS = Age-Related Eye Disease Study; MONMD = Multicenter Ophthalmic and Nutritional Age-Related Macular Degeneration Study; REACT = Roche European American Cataract Trial.

† Unless otherwise specified, comparisons were made between groups receiving the combination of the listed nutrients and groups receiving combinations of placebo or nutrients other than the nutrients listed.

‡ Total number was presented (when available) if the number in each comparison group was not reported.

§ 95% CIs are reported for the Linxian General Population Trial, and 99% CIs are reported for AREDS.

|| Difference from placebo,  $-0.7$  logMAR ( $P = 0.03$ ).

¶ Difference from placebo,  $-0.62$  ( $P = 0.07$ ).

\*\* Difference between groups,  $-1.6$  ( $P = 0.05$ ).

††  $P = 0.007$ .

‡‡  $P = 0.03$ .

§§  $P = 0.05$ .

|||  $P = 0.001$ .

¶¶  $P = 0.008$ .
